# Supplementary material for: Preparation Methods and Performance Analysis of Polyanthra-Quinone/Carbon Nanotube Composites for Capturing Carbon Dioxide
Source: MDPI journal article supplement (doi:10.3390/atmos13040543), 2022-03-29
Supplement: s1 [file s1]

**Table S1.** Technical indicators of the IR / Nicolet 6700 Fourier transform infrared spectrometer

| Instrument           | Fourier transform infrared spectrometer                                                              |
|----------------------|------------------------------------------------------------------------------------------------------|
| Model                | IR/Nicolet 6700                                                                                      |
| Manufacturer         | Thermo Fisher Scientific (USA)                                                                       |
| Spectral range       | 12000-350 cm <sup>-1</sup>                                                                           |
| Spectral resolution  | ≤0.09 cm <sup>-1</sup>                                                                               |
| S/N ratio            | ≥50,000:1 (1 min scan, 4cm <sup>-1</sup> resolution, KBr beam splitter, DTGS detector, peak-to-peak) |
| Wave number accuracy | 0.01 cm <sup>-1</sup>                                                                                |

**Table S2.** Technical indicators of JEM-2100F transmission electron microscopy

| Instrument           | Transmission electron microscopy |
|----------------------|----------------------------------|
| Model                | JEM-2100F                        |
| Manufacturer         | JEOL (Japan)                     |
| Point resolution     | 0.24 nm                          |
| Line resolution      | 0.10 nm                          |
| Acceleration voltage | 100, 120, 160, 200 kV            |
| Tilt angle           | 0.01 cm <sup>-1</sup><br>25°     |
| STEM resolution      | 0.20 nm                          |

**Table S3.** Technical indicators of Zennium electrochemical workstation

| Instrument                | Electrochemical workstation             |
|---------------------------|-----------------------------------------|
| Model                     | Zennium                                 |
| Manufacturer              | Zahner (Germany)                        |
| Application voltage range | ±10V                                    |
| Current range             | ±2.5A                                   |
| Potential accuracy        | 250μA                                   |
| Current accuracy          | 0.05% (2μA~100μA); 0.5% (<2μA & >100mA) |

**Table S4.** Technical indicators of GC-14B gas chromatograph

| Instrument                     | Electrochemical workstation   |
|--------------------------------|-------------------------------|
| Model                          | GC-14B                        |
| Manufacturer                   | Shimadzu                      |
| Total inlet flow setting range | 0-1250mL/min                  |
| Inlet pressure setting range   | 0-1035kPa                     |
| Maximum inlet temperature      | 420°C                         |
| Carrier gas pressure range     | 0-1035kPa                     |
| Carrier gas flow range         | 0-1250mL/min                  |
| Cooling rate                   | 300-50°C, less than 6 minutes |
| Heating up rate                | 250°C/min                     |
| Control temperature range      | Room temperature+10°C ~ 420°C |
